# Supplementary material for: In situnitridated porous nanosheet networked Co3O4–Co4N heteronanostructures supported on hydrophilic carbon cloth for highly efficient electrochemical hydrogen evolution
Source: Royal Society of Chemistry journal article supplement (doi:10.1039/c8ta09800j), 2018-12-04
Supplement: c8ta09800j1.pdf [file c8ta09800j1.pdf]

## Supporting Information

### ***In Situ* Nitridated Porous Nanosheet Networked $\text{Co}_3\text{O}_4\text{-Co}_4\text{N}$ Heteronanostructure Supported on Hydrophilic Carbon Cloth for Highly Efficient Electrochemical Hydrogen Evolution**

Bin Liu<sup>a</sup>, Junye Cheng<sup>a</sup>, Hui-Qing Peng<sup>b</sup>, , Da Chen<sup>c</sup>, Xiao Cui<sup>d</sup>, Dong Shen<sup>d</sup>, Kui Zhang<sup>e</sup>, Tianpeng Jiao<sup>a</sup>, Minfei Li<sup>c</sup>, Chun-Sing Lee<sup>d</sup>, Wenjun Zhang<sup>a, f\*</sup>

<sup>a</sup> Center of Super-Diamond and Advanced Films (COSDAF) & Department of Materials Science and Engineering, City University of Hong Kong, Tat Chee Avenue, Kowloon, Hong Kong, China

<sup>b</sup> Department of Chemistry, Institute for Advanced Study, Institute of Molecular Functional Materials and Division of Biomedical Engineering, The Hong Kong University of Science & Technology, Clear Water Bay, Kowloon, Hong Kong, China

<sup>c</sup> Department of Mechanical and Biomedical Engineering, City University of Hong Kong, Tat Chee Avenue, Kowloon, Hong Kong, China

<sup>d</sup> Center of Super-Diamond and Advanced Films (COSDAF) & Department of Chemistry, City University of Hong Kong, Tat Chee Avenue, Kowloon, Hong Kong, China

<sup>e</sup> School of Chemistry and Chemical Engineering, Anhui University of Technology, Ma'anshan, Anhui 243032, China

<sup>f</sup> City University of Hong Kong Shenzhen Research Institute, Shenzhen 518057, Guangdong, China

\* Corresponding author.

E-mail address: apwjzh@cityu.edu.hk

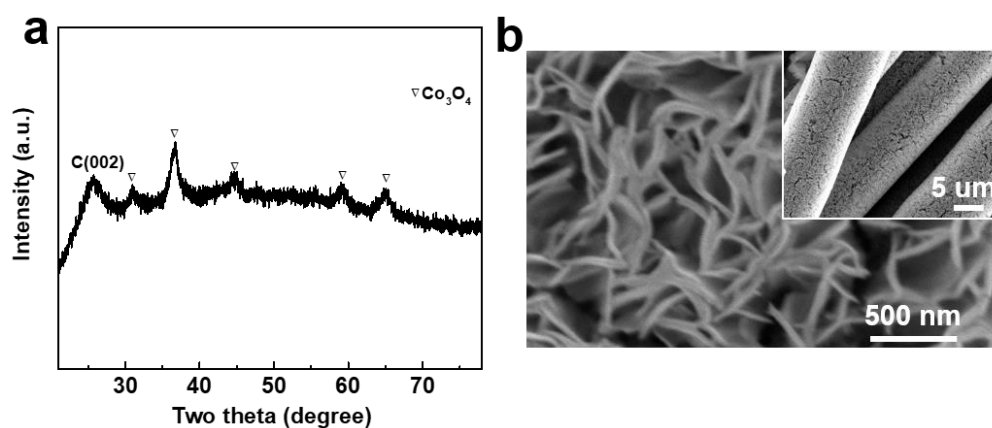

**Fig. S1.** (a) XRD pattern and (b) SEM images of  $\text{Co}_3\text{O}_4/\text{HCC}$  obtained by heat treatment of as-prepared  $\alpha\text{-Co}(\text{OH})_2/\text{HCC}$  at  $300\text{ }^\circ\text{C}$  for 1 h under air atmosphere. The  $\text{Co}_3\text{O}_4$  nanosheets formed apparently an interconnected network structure.

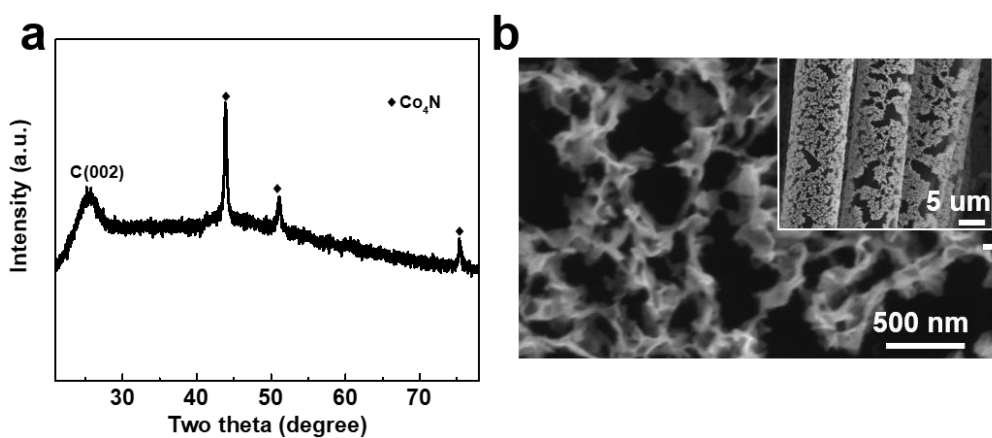

**Fig. S2.** (a) XRD pattern and (b) SEM images of  $\text{Co}_4\text{N}/\text{HCC}$  obtained by heat treatment of as-prepared  $\alpha\text{-Co}(\text{OH})_2/\text{HCC}$  at  $400\text{ }^\circ\text{C}$  for 1 h under  $\text{NH}_3$  atmosphere. The  $\text{Co}_4\text{N}$  nanosheets also formed a networked structure.

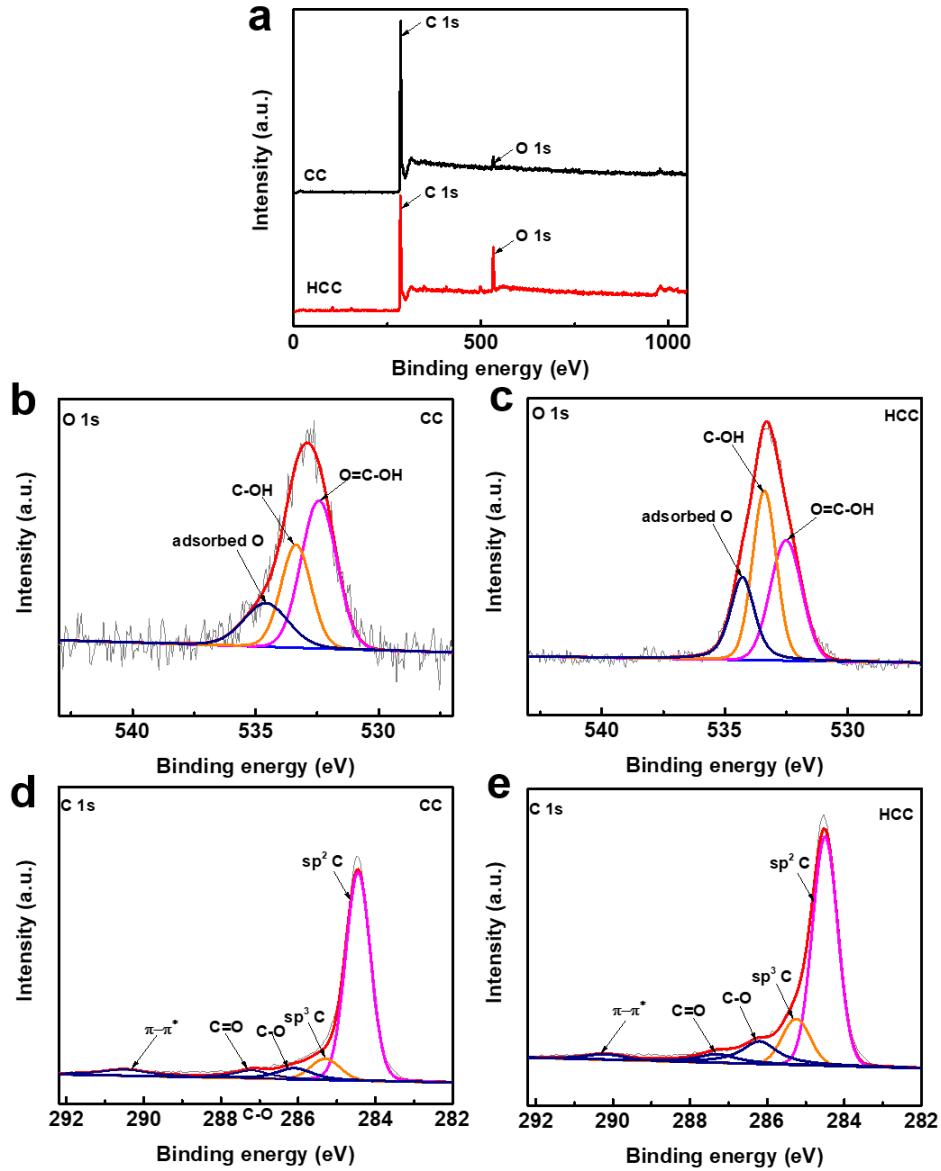

**Fig. S3.** (a) XPS survey spectra of CC and HCC. High-resolution spectra of O 1s (b) CC and (c) HCC, and high-resolution C 1s spectra of (d) CC and (e) HCC.

The C 1s peak in the XPS spectra can be split into five peaks at 284.5, 285.3, 286.1, 287.2, and 290.5 eV, which can be attributed to  $sp^2$ -bonded carbon,  $sp^3$ -bonded carbon, C-O groups, C=O groups, and  $\pi-\pi^*$  shake-up satellites, respectively.<sup>1</sup> The O 1s peak can be deconvoluted into three components, i.e., the peak at 532.4 eV for the carboxyl group ( $COO^-$ ), the peak at 533.3 eV for the hydroxyl (C-OH), and the peak at 534.6 eV for the chemisorbed oxygen.<sup>2, 3</sup> The content of C-OH and adsorbed oxygen increase after hydrogen plasma treatment. The increase in oxygen content can be attributed to edge-dangling bonds induced by the plasma treatment, which can either bind with oxygen to form oxygen-containing functional groups (e.g., C-OH) or adsorb water or oxygen when exposed to air.

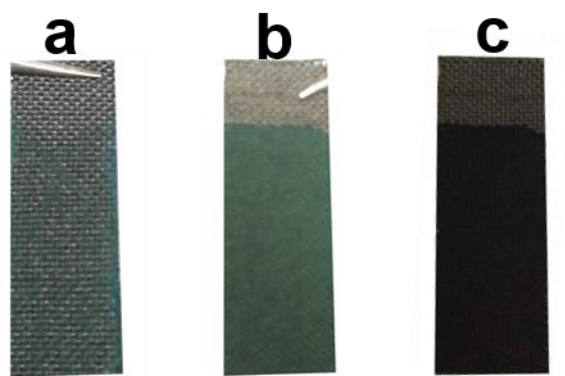

**Fig. S4.** Optical images of (a)  $\alpha\text{-Co(OH)}_2$  nanosheets grown on the untreated CC, (b)  $\alpha\text{-Co(OH)}_2$  nanosheets grown on HCC, and (c)  $\text{Co}_3\text{O}_4\text{-Co}_4\text{N}$  porous nanosheet networks grown on HCC.

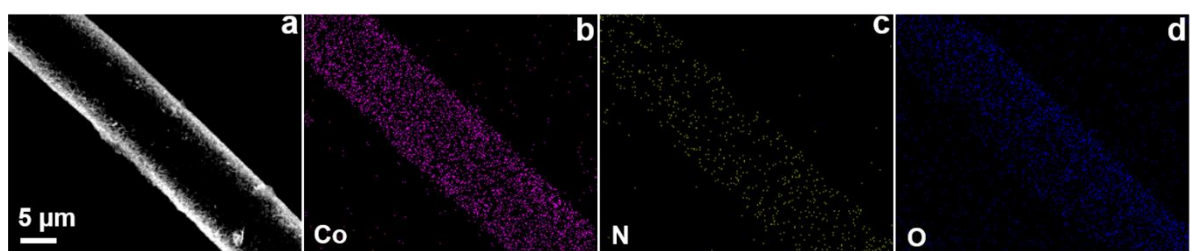

**Fig. S5.** SEM image and the corresponding elements mapping of  $\text{Co}_3\text{O}_4\text{-Co}_4\text{N}/\text{HCC}$  showing the distribution of (b) Co, (c) N, and (d) O over the surface of carbon fiber.

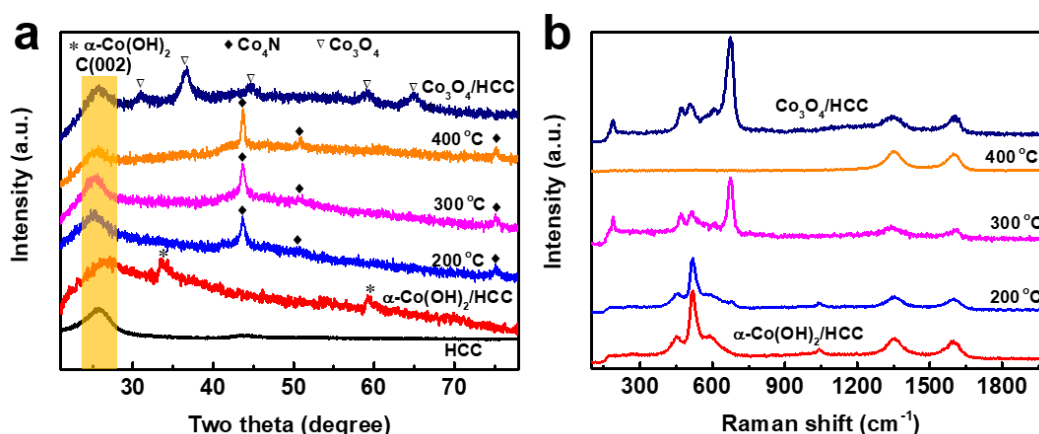

**Fig. S6.** (a) XRD patterns of HCC,  $\alpha\text{-Co(OH)}_2/\text{HCC}$ ,  $\text{Co}_3\text{O}_4/\text{HCC}$ , and the obtained products after nitrogen plasma treatment of  $\alpha\text{-Co(OH)}_2/\text{HCC}$  at different temperatures. (b) The corresponding Raman spectra of the samples.

XRD patterns showed that all the products after nitrogen plasma treatment at 200 °C, 300 °C and 400 °C contained  $\text{Co}_4\text{N}$  phase. However, due to the poor sensitivity of Raman spectroscopy to  $\text{Co}_4\text{N}$ ,<sup>4</sup> the Raman spectra of the corresponding samples only revealed  $\alpha\text{-Co(OH)}_2$  signal for the sample obtained at 200 °C, and  $\text{Co}_3\text{O}_4$  signal for the sample obtained at 300 °C. For the sample obtained at 400 °C, no additional bands besides the characteristic D ( $\sim 1350\text{ cm}^{-1}$ ) and G ( $\sim 1600\text{ cm}^{-1}$ ) peaks of HCC substrate were observed. The combination of the XRD and Raman results suggested that the  $\alpha\text{-Co(OH)}_2$  was partially nitridated to  $\text{Co}_4\text{N}$  at 200 °C, and the decomposition and nitridation of  $\alpha\text{-Co(OH)}_2$  occurred simultaneously at an elevated temperature of 300 °C, leading to the formation of  $\text{Co}_4\text{N}\text{-Co}_3\text{O}_4$  hybrid. When the temperature was increased to 400 °C, only  $\text{Co}_4\text{N}$  phase was obtained.

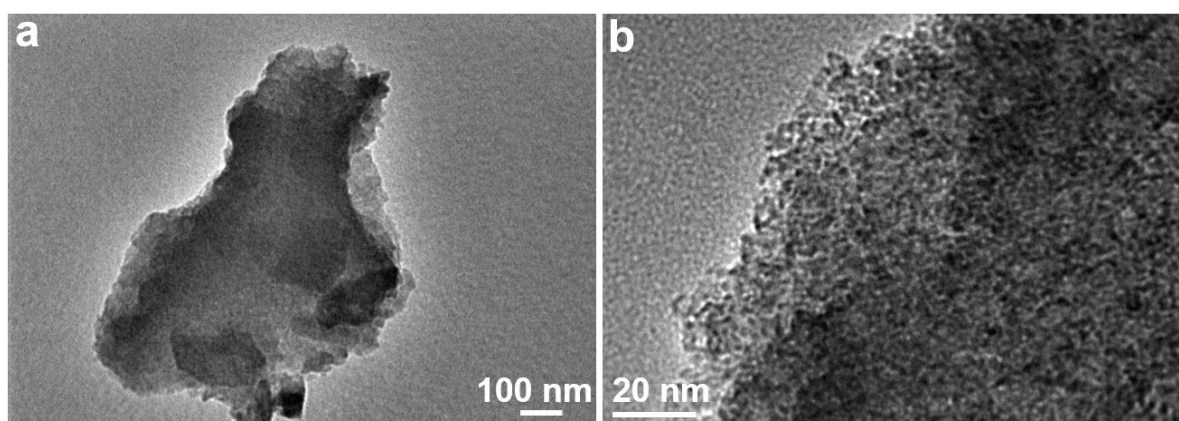

**Fig. S7.** TEM images of  $\alpha\text{-Co(OH)}_2$  nanosheets.

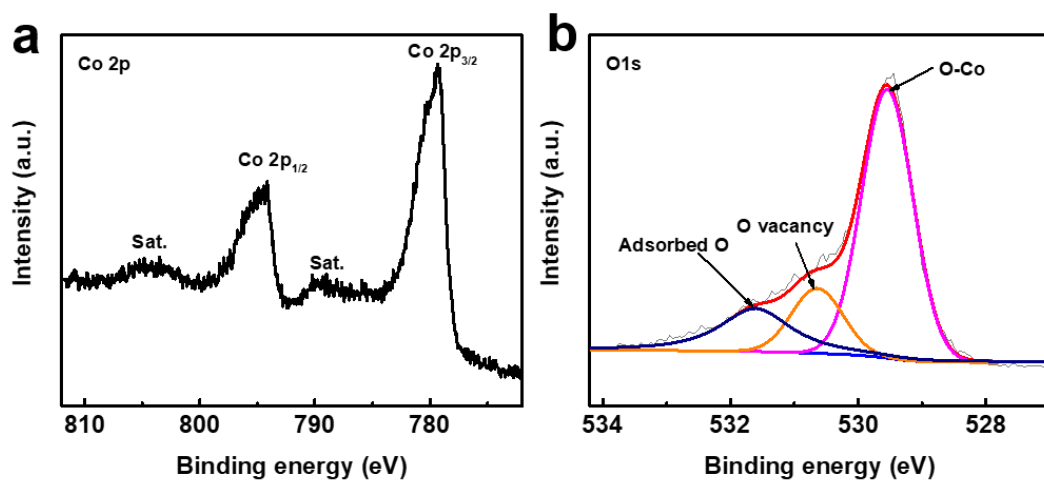

Fig. S8. High-resolution XPS spectra of (a) Co 2p and (b) O 1s of  $\text{Co}_3\text{O}_4$ .

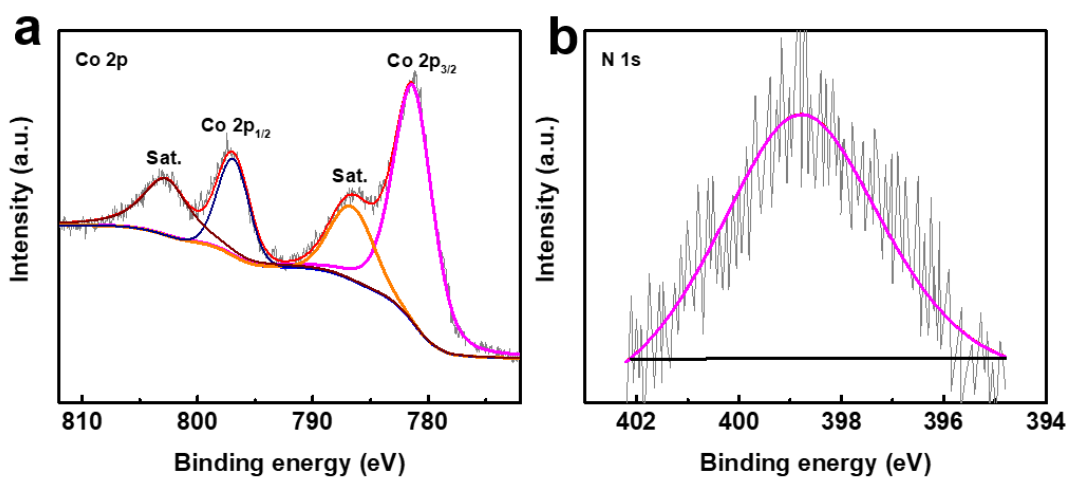

Fig. S9. High-resolution XPS spectra of (a) Co 2p and (b) N 1s of  $\text{Co}_4\text{N}$ .

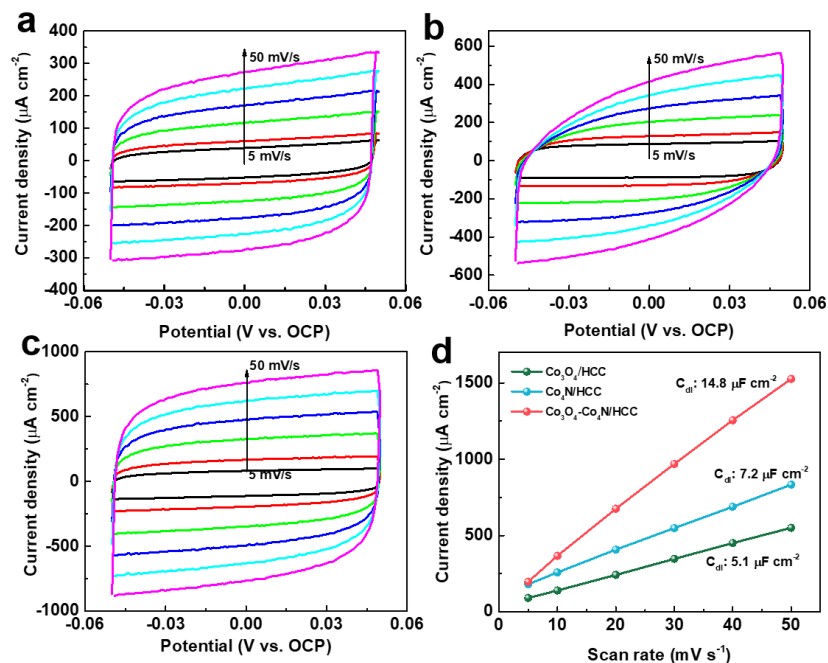

**Fig. S10.** (a) The CV curves of samples measured at different scan rates of 5, 10, 20, 30, 40, and 50  $\text{mV s}^{-1}$  in  $\text{CH}_3\text{CN}$  with 0.15 M  $\text{KPF}_6$ . (a)  $\text{Co}_3\text{O}_4/\text{HCC}$ , (b)  $\text{Co}_4\text{N}/\text{HCC}$ , and (c)  $\text{Co}_3\text{O}_4\text{-Co}_4\text{N}/\text{HCC}$ . (d) The dependence of difference between the anodic and cathodic current densities at the open circuit potential (OCP) on the scan rate of potential obtained on  $\text{Co}_3\text{O}_4/\text{HCC}$ ,  $\text{Co}_4\text{N}/\text{HCC}$  and  $\text{Co}_3\text{O}_4\text{-Co}_4\text{N}/\text{HCC}$ .

The double layer capacitance ( $C_{dl}$ ) was calculated through the slope of linear dependences divided by 2,<sup>5</sup> which could be considered as an indication of the electrochemically active surface areas of the samples.

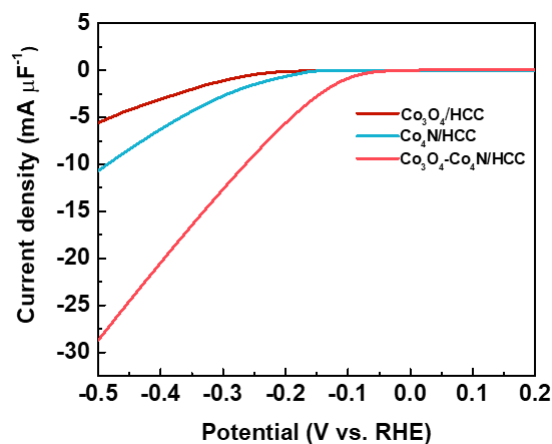

**Fig. S11.** Polarization curves normalized by the electrochemical double-layer capacitances of  $\text{Co}_3\text{O}_4/\text{HCC}$ ,  $\text{Co}_4\text{N}/\text{HCC}$ , and  $\text{Co}_3\text{O}_4\text{-Co}_4\text{N}/\text{HCC}$ .

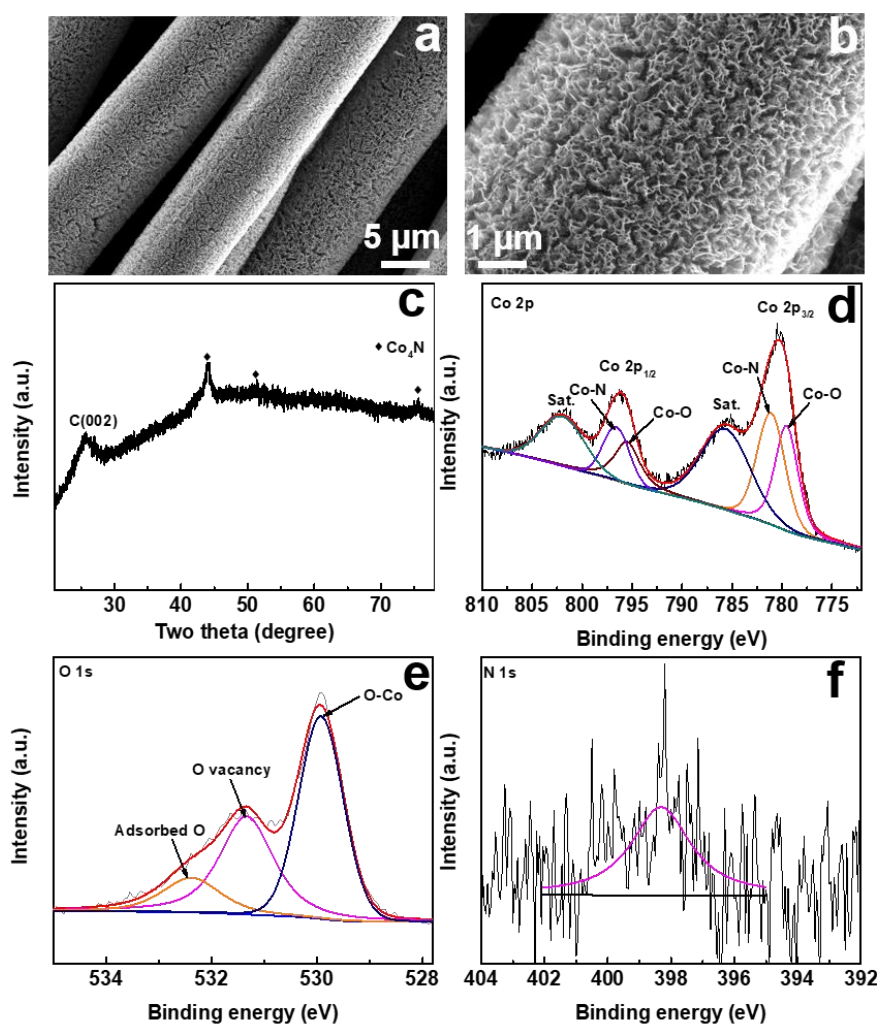

**Fig. S12.** (a, b) The SEM surface images and (c) XRD pattern of the  $\text{Co}_3\text{O}_4\text{-Co}_4\text{N}/\text{HCC}$  after HER stability measurement for 40 h in 1.0 M KOH solution. The corresponding high-resolution XPS spectra of (d) Co 2p, (e) O 1s and (f) N 1s of the sample.



**Table S1.** The C and O contents of CC and HCC from XPS measurement.

| Sample | C percent(%) | O percent (%) | O/C ratio |
|--------|--------------|---------------|-----------|
| CC     | 96.92        | 3.08          | 0.032     |
| HCC    | 87.78        | 12.22         | 0.139     |

**Table S2.** EDX analysis on the elemental compositions of the samples prepared by nitrogen plasma treatment with different durations.

| Samples | Atomic percentage (%) |      |      |
|---------|-----------------------|------|------|
|         | Co                    | O    | N    |
| 5 min   | 55.7                  | 41.2 | 3.1  |
| 10 min  | 63.7                  | 30.7 | 5.6  |
| 15min   | 70.2                  | 21.3 | 8.5  |
| 20 min  | 74.0                  | 15.4 | 10.6 |

**Table S3.** Comparison of the HER activity of the with other non-noble metal-based electrocatalysts with decent performance in basic condition.

| Catalysts                                             | Electrolyte | Current density (mA cm <sup>-2</sup> ) | Overpotential (mV) | Tafel slope (mV dec <sup>-1</sup> ) | Reference                                              |
|-------------------------------------------------------|-------------|----------------------------------------|--------------------|-------------------------------------|--------------------------------------------------------|
| Co <sub>3</sub> O <sub>4</sub> -Co <sub>4</sub> N/HCC | 1.0 M KOH   | 10                                     | 90                 | 57.8                                | This work                                              |
| Co-MoS <sub>2</sub> /CC                               | 1.0 M KOH   | 10                                     | 203                | 158                                 | <i>Energy Environ. Sci.</i> <b>2016</b> , 9, 2789.     |
| Ni-P/carbon paper                                     | 1.0 M KOH   | 10                                     | 100                | 85.4                                | <i>Adv. Funct. Mater.</i> <b>2016</b> , 26, 4067.      |
| Fe-CoP/Ti                                             | 1.0 M KOH   | 10                                     | 78                 | 75                                  | <i>Adv. Mater.</i> <b>2017</b> , 29, 1602441.          |
| Ni-MoS <sub>2</sub> /CC                               | 1.0 M KOH   | 10                                     | 98                 | 60                                  | <i>Energy Environ. Sci.</i> <b>2016</b> , 9, 2789.     |
| MoC <sub>x</sub> nano-octahedrons                     | 1.0 M KOH   | 10                                     | 151                | 59                                  | <i>Nat. Commun.</i> <b>2015</b> , 6, 6512.             |
| MoS <sub>2</sub> /NiCo-LDH/CFP                        | 1.0 M KOH   | 10                                     | 78                 | 77                                  | <i>Joule</i> , <b>2017</b> , 1, 383.                   |
| Co-Ni <sub>3</sub> N nanorods                         | 1.0 M KOH   | 10                                     | 194                | 156                                 | <i>Adv. Mater.</i> <b>2018</b> , 30, 1705516.          |
| CoP nanowires                                         | 1.0 M KOH   | 10                                     | 209                | 129                                 | <i>J. Am. Chem. Soc.</i> <b>2014</b> , 136, 7587.      |
| NiCo <sub>2</sub> S <sub>4</sub> nanowire/NF          | 1.0 M KOH   | 10                                     | 210                | 58.9                                | <i>Adv. Funct. Mater.</i> <b>2016</b> , 26, 4661.      |
| Ni-NiO/N-rGO                                          | 1.0 M KOH   | 10                                     | 135                | 46                                  | <i>Adv. Funct. Mater.</i> <b>2015</b> , 25, 5799.      |
| Ni <sub>2</sub> P/Fe <sub>2</sub> P                   | 1.0 M KOH   | 10                                     | 121                | 67                                  | <i>Adv. Energy Mater.</i> <b>2018</b> , 8, 1800484.    |
| Se-(NiCo)S <sub>x</sub> /(OH) <sub>x</sub>            | 1.0 M KOH   | 10                                     | 103                | 87.3                                | <i>Adv. Mater.</i> <b>2018</b> , 30, 1705538.          |
| Co/CoP                                                | 1.0 M KOH   | 10                                     | 253                | 73.8                                | <i>Adv. Energy Mater.</i> <b>2017</b> , 7, 1602355.    |
| Mn-Co-P                                               | 1.0 M KOH   | 10                                     | 76                 | 52                                  | <i>ACS Catal.</i> <b>2016</b> , 7, 98.                 |
| Ni <sub>5</sub> P <sub>4</sub> /Ni foil               | 1.0 M KOH   | 10                                     | 150                | 53                                  | <i>Angew. Chem. Int. Ed.</i> <b>2015</b> , 127, 12538. |

|                                                               |            |    |         |    |                                                       |
|---------------------------------------------------------------|------------|----|---------|----|-------------------------------------------------------|
| Ni <sub>0.89</sub> Co <sub>0.11</sub> Se <sub>2</sub> MNSN/NF | 1.0 M KOH  | 10 | 85      | 52 | <i>Adv. Mater.</i> <b>2017</b> , 29, 1606521.         |
| NiMoN/CC                                                      | 1.0 M KOH  | 10 | 109     | 95 | <i>Adv. Energy Mater.</i> <b>2016</b> , 6, 1600221.   |
| N-Ni <sub>3</sub> S <sub>2</sub> /NF                          | 1.0 M KOH  | 10 | 110     | -  | <i>Adv. Mater.</i> <b>2017</b> , 29, 1701584.         |
| V-Co <sub>4</sub> N nanosheets                                | 1.0 M KOH  | 10 | 37      | 44 | <i>Angew. Chem. Int. Ed.</i> <b>2018</b> , 130, 5170. |
| 3D Ni–Mo alloy                                                | 1.0 M NaOH | 20 | 34      | -  | <i>ChemElectroChem</i> <b>2014</b> , 1, 1138.         |
| Co–Mo–P                                                       | 1.0 M KOH  | 10 | 30 ~ 35 | 63 | <i>ChemCatChem</i> <b>2018</b> , 10, 4832.            |
| MoNi <sub>4</sub> /MoO <sub>2</sub> @Ni                       | 1.0 M KOH  | 10 | 15      | 30 | <i>Nat. Commun.</i> <b>2017</b> , 8, 15437.           |

**Table S4.** The overpotential at the current density of 10 mA cm<sup>-2</sup> ( $\eta_{10}$ ), Tafel slope, MA, TOF,  $C_{dl}$ , and  $R_{ct}$  of the samples from electrocatalytic HER tests.

| Catalysts                                             | $\eta_{10}$<br>(mV) | Tafel slope<br>(mV dec <sup>-1</sup> ) | MA<br>(A g <sup>-1</sup> ) | TOF<br>(s <sup>-1</sup> ) | $C_{dl}$<br>( $\mu$ F cm <sup>-2</sup> ) | $R_{ct}$ ( $\Omega$ ) |
|-------------------------------------------------------|---------------------|----------------------------------------|----------------------------|---------------------------|------------------------------------------|-----------------------|
| Co <sub>3</sub> O <sub>4</sub> -Co <sub>4</sub> N/HCC | 90                  | 57.8                                   | 50.6                       | 0.02                      | 14.8                                     | 6                     |
| Co <sub>4</sub> N/HCC                                 | 245                 | 87.9                                   | 4.05                       | 0.0016                    | 7.2                                      | 16                    |
| Co <sub>3</sub> O <sub>4</sub> /HCC                   | 348                 | 136.7                                  | 0.95                       | 0.00038                   | 5.1                                      | 144                   |

## References

1. L. Tao, Q. Wang, S. Dou, Z. Ma, J. Huo, S. Wang and L. Dai, *Chem. Commun.*, 2016, **52**, 2764-2767.
2. L.-Z. Fan, S. Qiao, W. Song, M. Wu, X. He and X. Qu, *Electrochim. Acta* 2013, **105**, 299-304.
3. I.-Y. Jeon, H.-J. Choi, S.-M. Jung, J.-M. Seo, M.-J. Kim, L. Dai and J.-B. Baek, *J. Am. Chem. Soc.*, 2012, **135**, 1386-1393.
4. G. Gubert, E. Ribeiro, J. Varalda, A. G. Bezerra, W. H. Schreiner and D. H. Mosca, *J. Alloys Compd.*, 2017, **725**, 519-525.
5. Y. Yoon, B. Yan and Y. Surendranath, *J. Am. Chem. Soc.*, 2018, **140**, 2397-2400.
